# Supplementary material
Source: PubMed Central journal article supplement (PMC1568945)

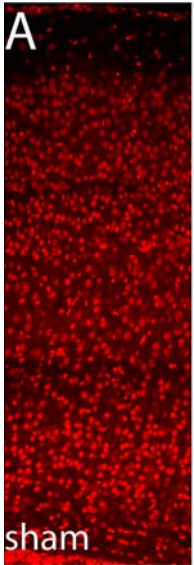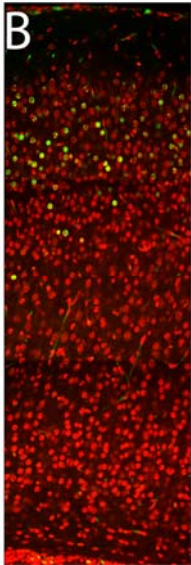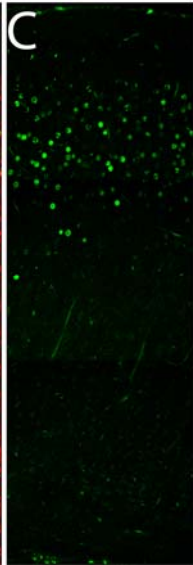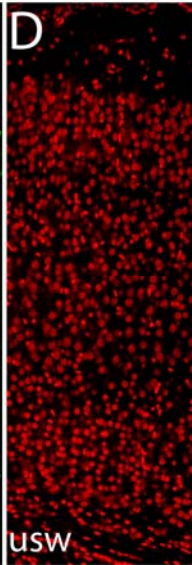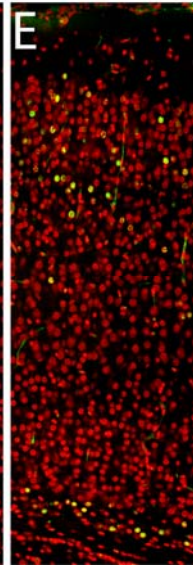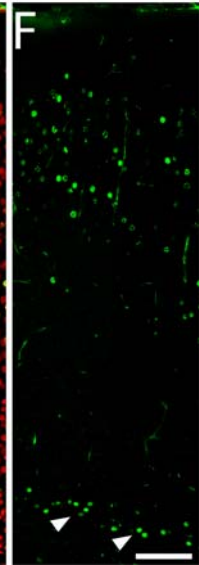

Supplement: pnas_0605294103_1.pdf [file pnas_0605294103_1.pdf]

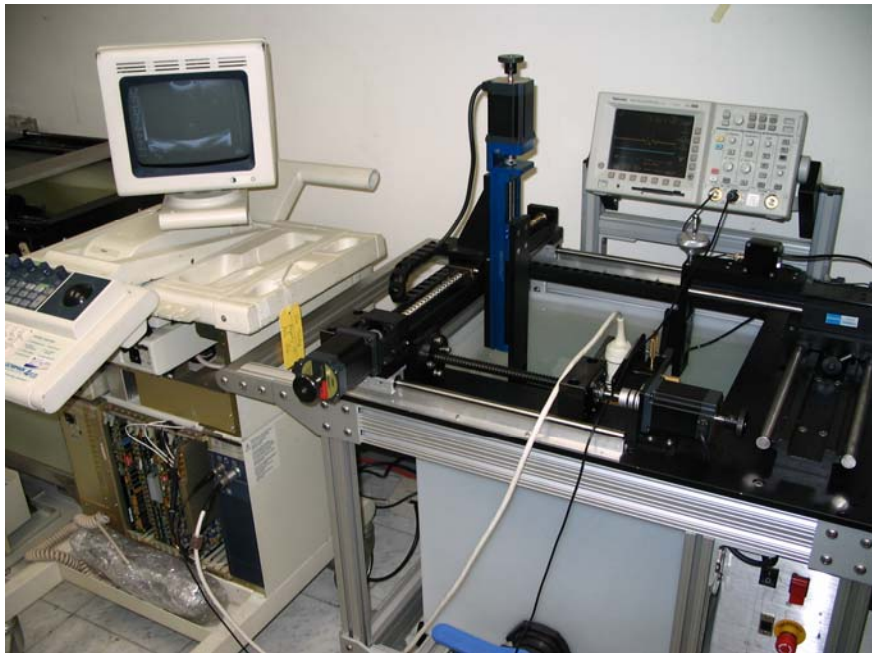

Supplement: pnas_0605294103_2.pdf [file pnas_0605294103_2.pdf]

### Axial Plot of PII(z), Beamwidth

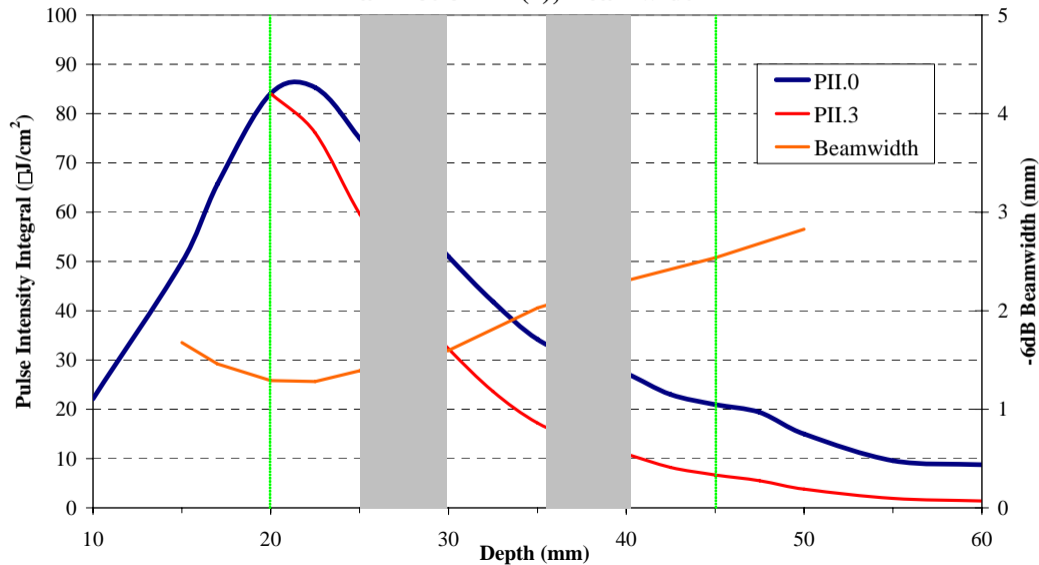

Supplement: pnas_0605294103_3.pdf [file pnas_0605294103_3.pdf]

**Cross Axis Intensity Plot; depth 2.5cm from transducer face**

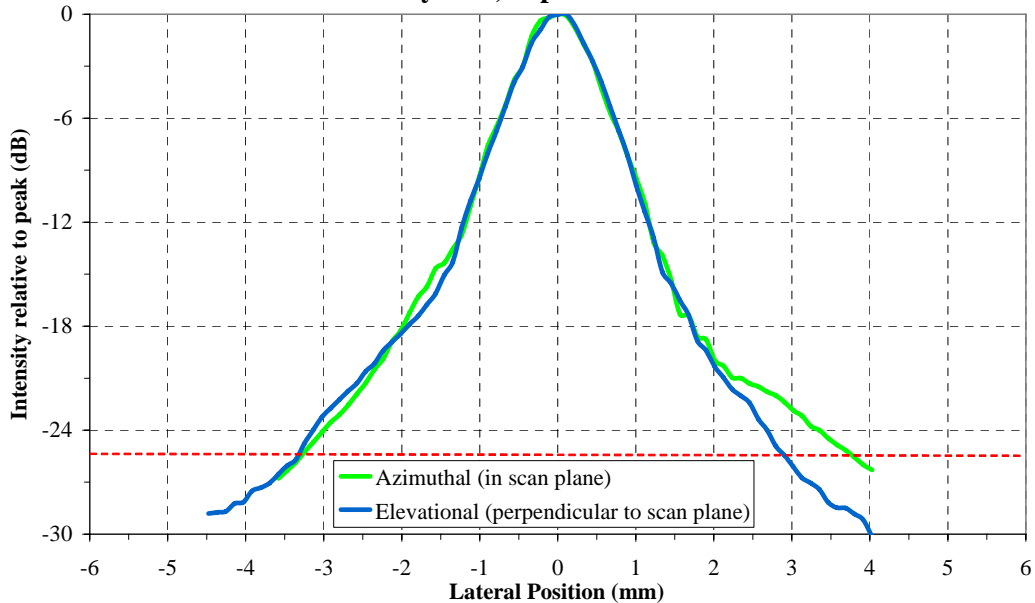

Supplement: pnas_0605294103_4.pdf [file pnas_0605294103_4.pdf]

### Pressure-Time Waveform at 2.5cm

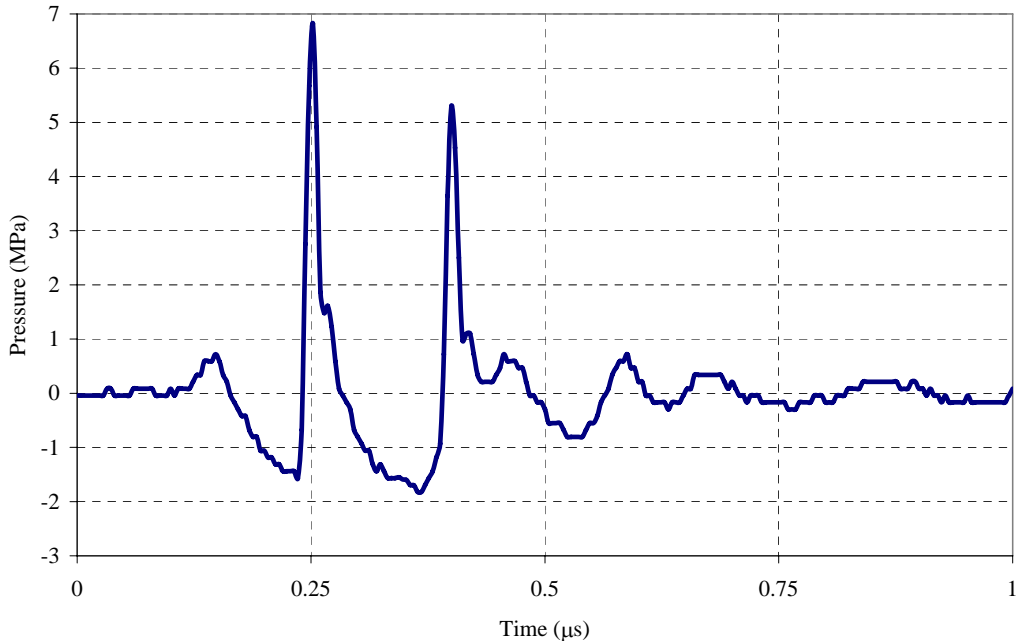

Supplement: pnas_0605294103_5.pdf [file pnas_0605294103_5.pdf]

Scanning Beam Pattern

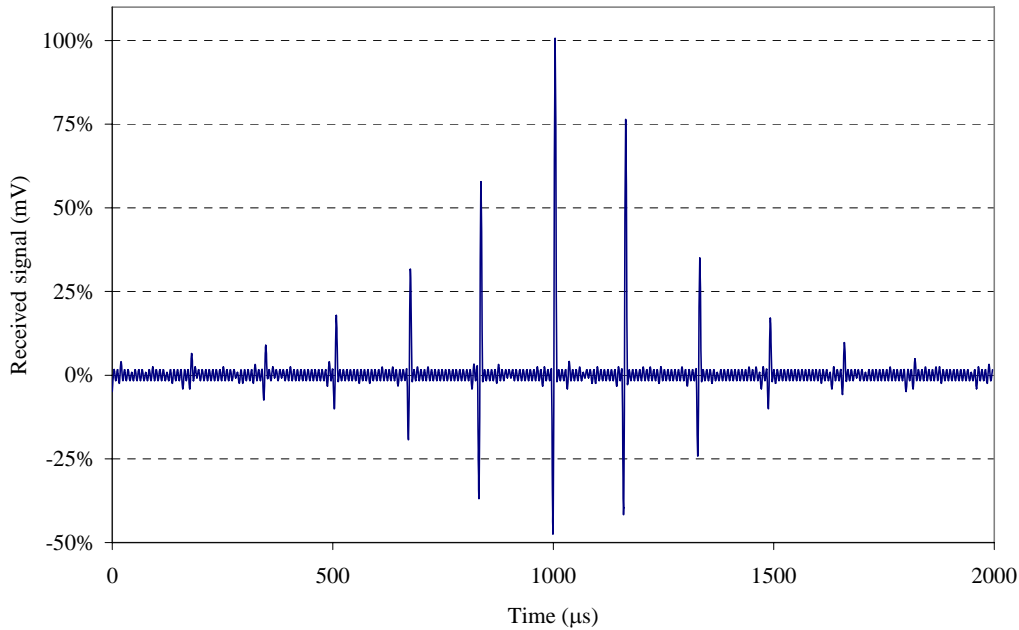

Supplement: pnas_0605294103_6.pdf [file pnas_0605294103_6.pdf]

**Cross Axis Intensity Plot; depth 4.5cm from transducer face**

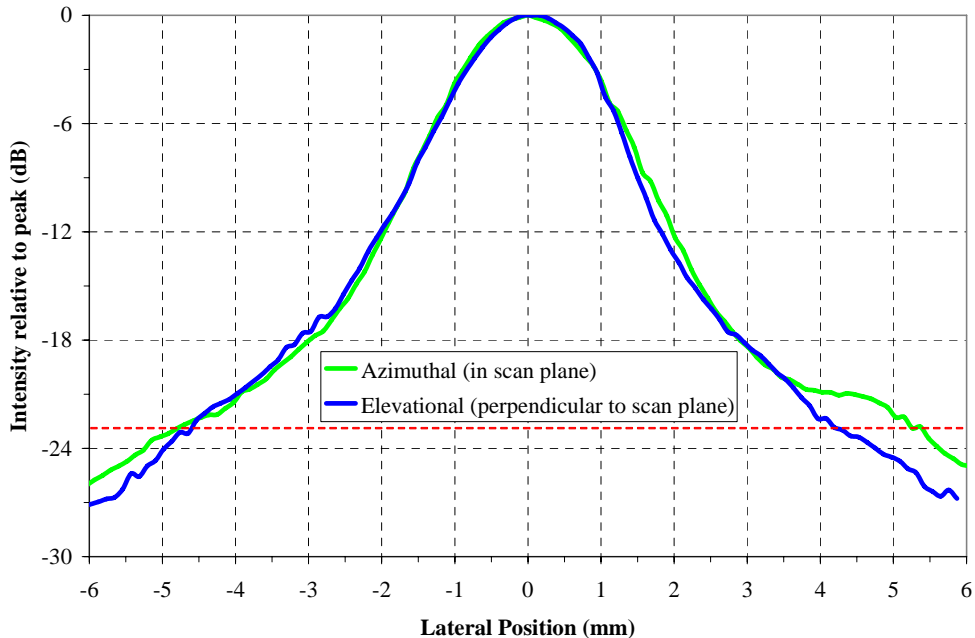

Supplement: pnas_0605294103_7.pdf [file pnas_0605294103_7.pdf]

## Comparison between Reference Hydrophone and Pinducer

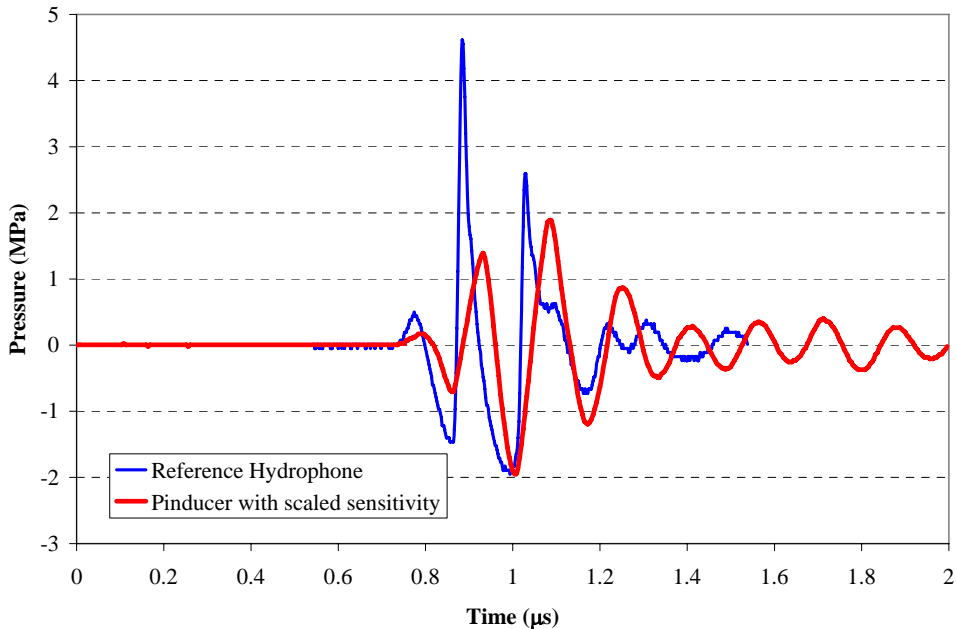

Supplement: pnas_0605294103_8.pdf [file pnas_0605294103_8.pdf]
